# Supplementary material for: Pseudocapacitance electrode and asymmetric supercapacitor based on biomass juglone/activated carbon composites
Source: Royal Society of Chemistry journal article supplement (doi:10.1039/c9ra05858c), 2019-01-01
Supplement: c9ra05858c1.pdf [file c9ra05858c1.pdf]

Electronic Supplementary Material (ESI) for RSC Advances.

## Pseudocapacitance electrode and asymmetric supercapacitor based on biomass Juglone/activated carbon composites

Xin He<sup>a</sup>, Qian Chen<sup>a</sup>, Xiling Mao<sup>a</sup>, Weichen Liu<sup>a</sup>, Yujiu Zhou<sup>a</sup>, Wenyao Yang<sup>b</sup>, YajieYang<sup>a</sup>, Jianhua Xu<sup>\*a</sup>

<sup>a</sup> State Key Laboratory of Electronic Thin Films and Integrated Devices  
School of Optoelectronic Science and Engineering, University of Electronic Science and Technology of China, No.4, Section 2, North Jianshe Road, Chengdu 610054, P. R. China. Email: jianhuaxu8023@126.com

<sup>b</sup> Engineering Research Center of Electronic Information Technology and Application  
School of Electrical and Electronic Engineering, Chongqing University of Arts and Sciences, Chongqing 402160, P.R. China

### 1. Supporting figures

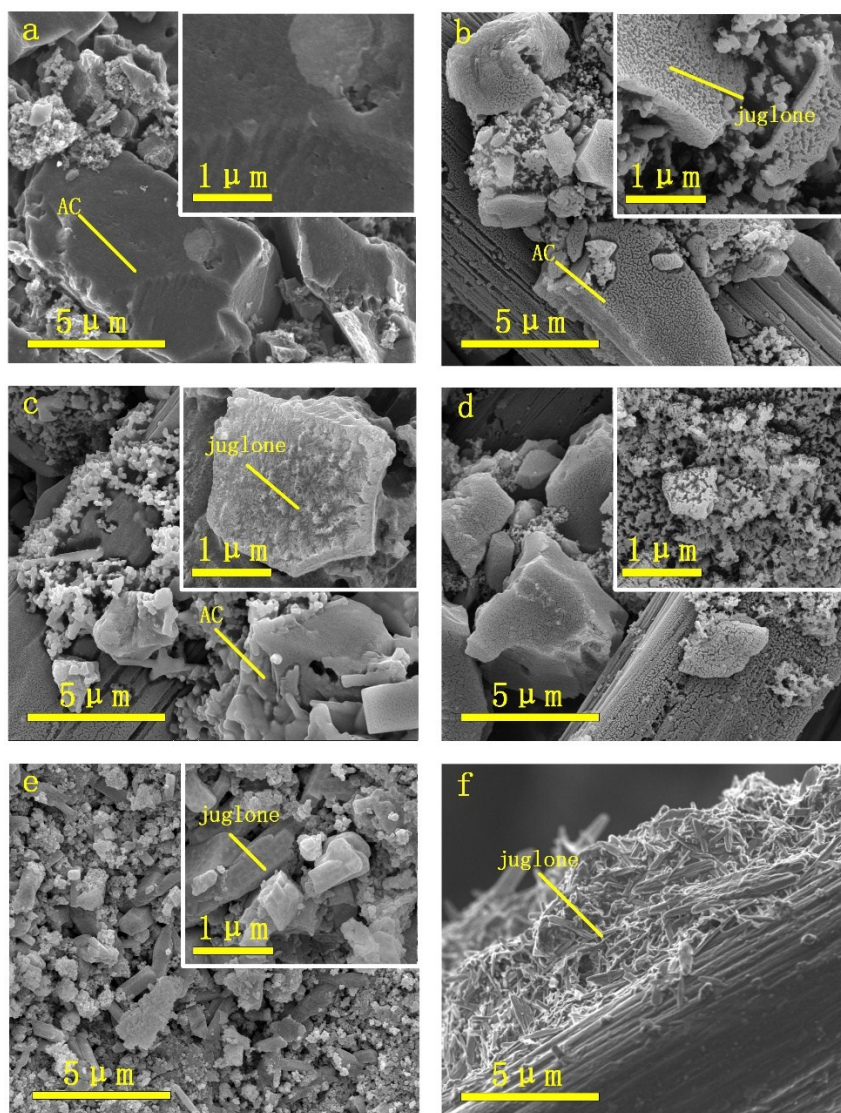

**Figure S1.** SEM images of pure AC electrodes (a), 1:9 group(b) , 1:3 group (c),1:1 group (d), 3:1 group (e)and pure juglone electrodes(f)

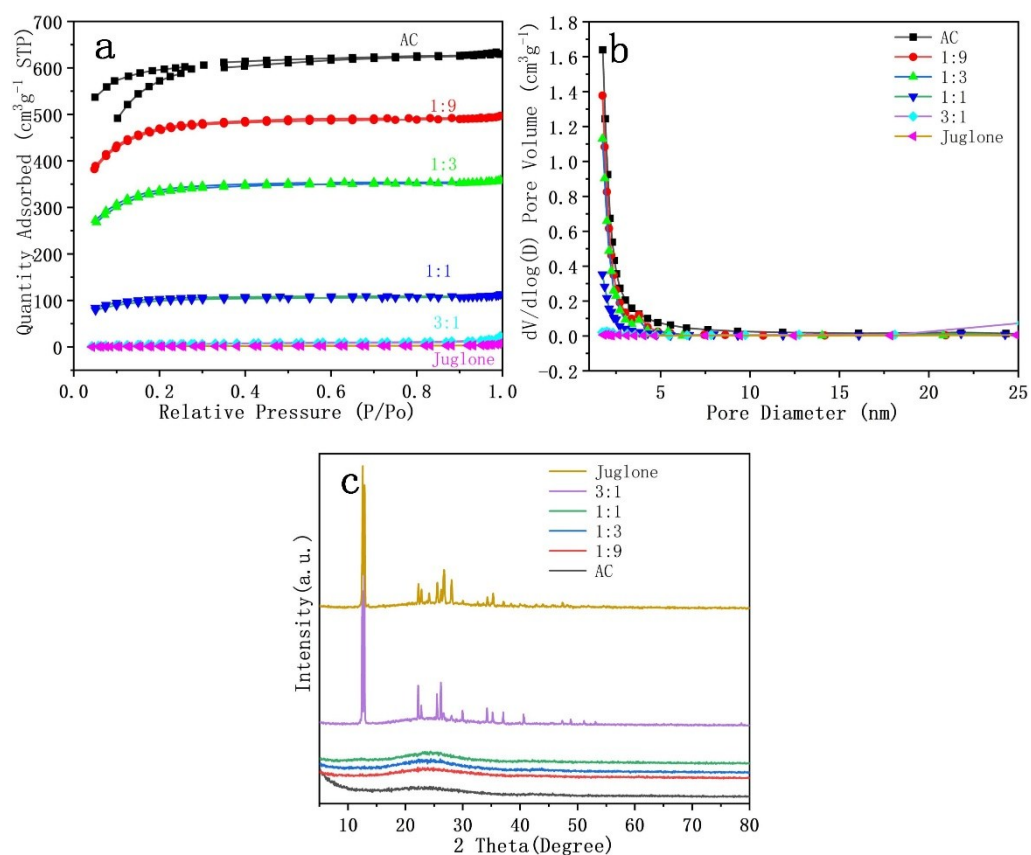

**Figure s2.** The Nitrogen adsorption-desorption isotherms (a) and the pore size distribution curves (b) and the XRD patterns (c) of AC, 1:9, 1:3, 1:1, 3:1, Juglone samples.

Table s1.

Comparison of values in our work with that reported supercapacitors electrodes materials.

| Materials                            | Test condition         | Specific capacitance                              | Cycle stability(cycle number) | energy density                                  | power density                                     | Ref.      |
|--------------------------------------|------------------------|---------------------------------------------------|-------------------------------|-------------------------------------------------|---------------------------------------------------|-----------|
| Juglone/AC                           | 0.25 A g <sup>-1</sup> | 265 F g <sup>-1</sup><br>1300 mF cm <sup>-2</sup> | 75%(3000)                     | 9 Wh kg <sup>-1</sup><br>12 Wh kg <sup>-1</sup> | 2 kW kg <sup>-1</sup><br>0.18 kW kg <sup>-1</sup> | this work |
| bacteria doped ZnO/sponge            | 0.2 A g <sup>-1</sup>  | 133 F g <sup>-1</sup>                             | 89%(5000)                     | 18 Wh kg <sup>-1</sup>                          | 0.096 kW kg <sup>-1</sup> <sub>1</sub>            | [38]      |
| MnO <sub>2</sub> on the carbon fiber | 5 mV s <sup>-1</sup>   | 130 F g <sup>-1</sup><br>790 mF cm <sup>-2</sup>  | -                             | -                                               | -                                                 | [39]      |
| Juglone/PPY                          | 5 μA cm <sup>-1</sup>  | 1.78 mF cm <sup>-1</sup>                          | 95%(1000)                     | -                                               | -                                                 | [22]      |
| Porous carbon                        | 1 A g <sup>-1</sup>    | 279 F g <sup>-1</sup>                             | 97%(10000)                    | 16.9 Wh kg <sup>-1</sup>                        | 0.08 kW kg <sup>-1</sup>                          | [40]      |
